# Supplementary material for: The use of low-cost Android tablets to train community health workers in Mukono, Uganda, in the recognition, treatment and prevention of pneumonia in children under five: a pilot randomised controlled trial
Source: Springer Nature journal article supplement (doi:10.1186/s12960-018-0315-7), 2018-09-19

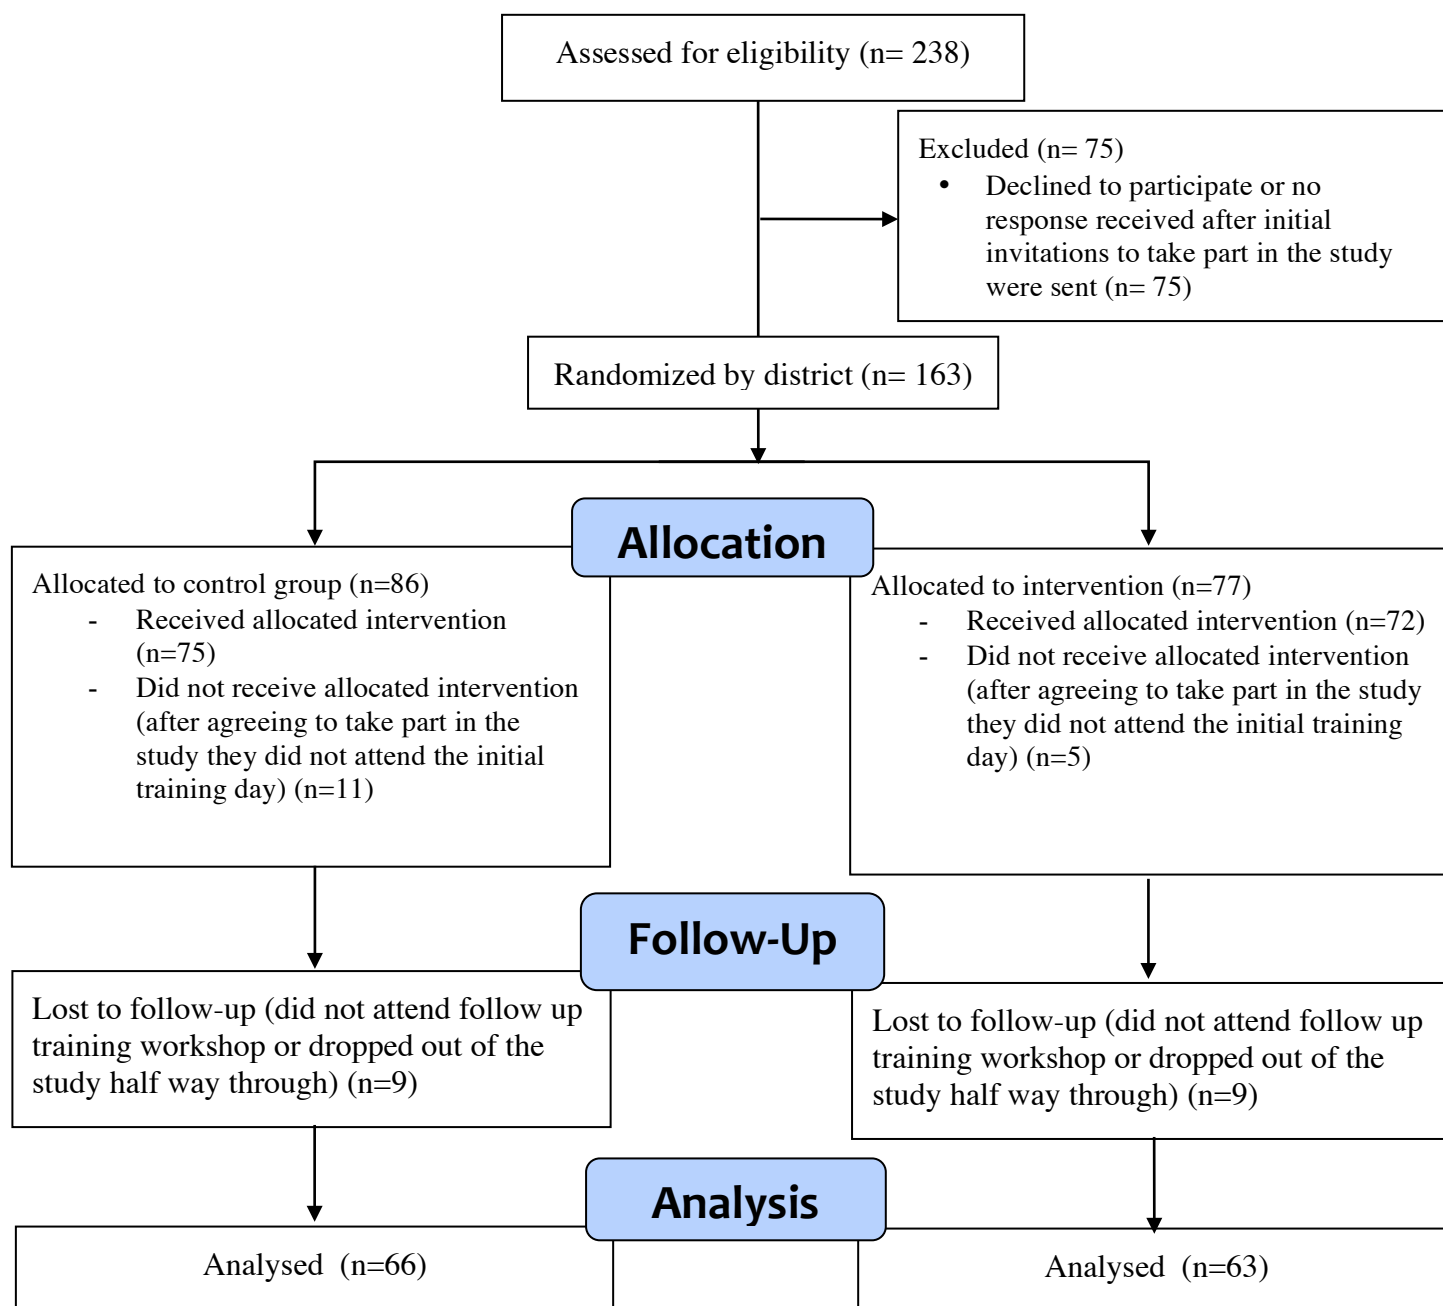

Supplement: MOESM1 [file 16137390]
