# Supplementary material for: The use of low-cost Android tablets to train community health workers in Mukono, Uganda, in the recognition, treatment and prevention of pneumonia in children under five: a pilot randomised controlled trial
Source: Springer Nature journal article supplement (doi:10.1186/s12960-018-0315-7), 2018-09-19
Supplement: MOESM3 [file 16137390]

1 **Date** \_\_\_\_\_  
2 **VHT Study Number (Identifier)** \_\_\_\_\_  
3 **Parish** \_\_\_\_\_  
4 **Subcounty** \_\_\_\_\_

5  
6 **REMEMBER TO USE YOUR SICK CHILD JOB AID IF YOU NEED TO.**  
7 **ANSWER ALL QUESTIONS.**  
8

9 **Case 1:**

10  
11 Ben is age 7 months. He has been coughing for 2 weeks. He does not have a fever or  
12 blood in his spit.

13  
14 Watch the video and count the number of breaths he takes in one minute to work out  
15 if he has fast breathing or not. Use the SCJA if you needed to.

16  
17 1) How many breaths did Ben take in one minute?

18  
19 2) Does Ben have fast breathing? (*Circle one answer*)

20 Yes No

21  
22 3) Does Ben have chest in-drawing? (*Circle one answer*)

23 Yes No

24  
25 4) Does Ben need treatment in the community, a referral to the health center,  
26 or will his illness resolve itself? (*Circle one answer*)

- 27  
28 a. Treat in Community by VHT  
29 b. Refer to Health Centre  
30 c. His illness will resolve and he does not need any follow up

31  
32 **Case 2:**

33  
34 Lord is 7 months old. He has a cough and fever.

35  
36 His breathing rate is much slower. You determine that he has pneumonia but can  
37 be treated in the community with antibiotics.

38  
39 1) Which antibiotic would you use, or advise the family to purchase? (*Circle one*  
40 *answer*)

- 41  
42 a. Amoxicillin  
43 b. Cotrimoxizole  
44 c. Ciprofloaxcin

45 2) What dose of antibiotic would you need to give him or tell them to give him?  
46 (*Circle one answer*)

47  
48  
49  
50  
51  
52  
53  
54  
55  
56  
57  
58  
59  
60  
61  
62  
63  
64  
65  
66  
67  
68  
69  
70  
71  
72  
73  
74  
75  
76  
77  
78  
79  
80  
81  
82  
83  
84  
85  
86  
87  
88  
89  
90

- a. Red Pack - 250mg, twice daily for 5 days
- b. Green Pack – 500mg, twice a day, for 5 days
- c. Purple Pack – 1000mg, three times a day, for 10 days

3) If you will not be starting the antibiotics yourself, when will you tell the family to start treatment with antibiotics? (*Circle one answer*)

- a. Immediately, within 24 hours
- b. Next week
- c. Tell them not to start antibiotics

**Case 3:**

Josh is age 6 months. He has been coughing for 2 days.

He has no blood in his spit, no fever and no chest in-drawing.

Watch the video and count the number of breaths he takes in one minute to work out if he has fast breathing or not. Use the SCJA if you need to.

- 1) How many breaths did Josh take in one minute?
- 2) Does Josh have fast breathing? (*Circle one answer*)

Yes No

- 3) Does Josh need treatment in the community, a referral to the health centre, or will his illness resolve itself? (*Circle one answer*)

- a. Treat in Community by VHT
- b. Refer to Health Centre
- c. His illness will resolve and he does not need any follow up

**Case 4:**

Mugisa is 6 months old. He has a cough and fever, but no fast breathing.

He has NO chest in-drawing.

You determine that he has pneumonia but does not need to be referred to a health center; you will treat him in the community.

- 1) Which antibiotic would you need to treat him with? (*Circle one answer*)

- a. Amoxicillin



- 139 a. Red Pack - 250mg, twice daily for 5 days
- 140 b. Green Pack – 500mg, twice a day, for 5 days
- 141 c. No antibiotic needed

142 **Case 7:**

143  
144 Jenny is age 11 months. She has been coughing for 3 days, but has had no blood in  
145 her spit. You have examined her and determined she does have a fever.

146  
147 After watching her chest, you determined that she does NOT have chest in-drawing.

148  
149 Watch the video and count the number of breaths she takes in one minute to work out  
150 if she has fast breathing or not. Use the SCJA if you need to.

151  
152 1) How many breaths did Jenny take in one minute?

153  
154 2) Does Jenny have fast breathing? (Circle one answer)

155 Yes or No

156  
157 3) How should Jenny be managed? (Circle one answer)

- 158
- 159 a. Manage in Community by VHT
- 160 b. Refer to Health Center
- 161 c. Do not do anything

162  
163 4) If Jenny can be managed in the community by the VHT, how should she be  
164 managed initially? (*Circle one answer*)

- 165
- 166 a. Treat with antibiotics
- 167 b. No treatment with antibiotics now, but follow-up check in 2 days
- 168 c. Do nothing at all

169
