# Supplementary material for: The use of low-cost Android tablets to train community health workers in Mukono, Uganda, in the recognition, treatment and prevention of pneumonia in children under five: a pilot randomised controlled trial
Source: Springer Nature journal article supplement (doi:10.1186/s12960-018-0315-7), 2018-09-19
Supplement: MOESM5 [file 16137390]

**Additional file 5. Demographic data.**

|                                                                       | <b>Control Group</b><br>(n=66)<br>( <i>Mean;±S.D;</i><br><i>Range</i> ) | <b>Intervention Group</b> (n=63)<br>( <i>Mean;±S.D;</i><br><i>Range</i> ) | <b>P-value</b> |
|-----------------------------------------------------------------------|-------------------------------------------------------------------------|---------------------------------------------------------------------------|----------------|
| Gender<br>(Female:Male)                                               | 38:28                                                                   | 33:30                                                                     | 0.678          |
| Age                                                                   | 44.6 (±12.5; 48)                                                        | 43.7 (±10.3; 50)                                                          | 0.658          |
| Number of Years<br>as a CHW                                           | 5.9 (±1.66; 8)                                                          | 5.6 (±1.16; 7)                                                            | 0.250          |
| Number of Years<br>of Education                                       | 9.2 (±2.5; 10)                                                          | 8.7 (±2.52; 12)                                                           | 0.382          |
| Average number<br>of children in their<br>household                   | 5.3 (±2.63; 14)                                                         | 5.1 (±3.72; 21)                                                           | 0.820          |
| Average number<br>of children in their<br>household age<br>under five | 1.6 (±1.17; 5)                                                          | 1.4 (±1.4; 7)                                                             | 0.327          |

**Legend.** A breakdown of demographic data between the control and intervention groups.
